# Supplementary material for: Monolayer protected gold nanoparticles: the effect of the headgroup–Au interaction
Source: Royal Society of Chemistry journal article supplement (doi:10.1039/c4cp01963f), 2014-06-18
Supplement: c4cp01963f1.pdf [file c4cp01963f1.pdf]

## Monolayer Protected Gold Nanoparticles. Effect of the headgroup-Au interaction

J. A. Olmos-Asar<sup>1,2‡</sup>, M. Ludueña<sup>1‡</sup> and M. M. Mariscal<sup>1\*</sup>

<sup>1</sup>Departamento de Matemática y Física, Facultad de Ciencias Químicas. Universidad Nacional de Córdoba. INFIQC, CONICET. (XUA5000) Córdoba. Argentina.

<sup>2</sup>Dipartimento di Fisica, Università di Trieste, Strada Costiera 11, I-34151- Trieste, Italia.

### Supplementary Information

| Adsorption site      | thiol/Au | thiol/Au | amine/Au | amine/Au |
|----------------------|----------|----------|----------|----------|
|                      | $D_e$    | $r_e$    | $D_e$    | $r_e$    |
| on-top (111)         | 0.404    | 2.43     | 0.189    | 2.45     |
| on-top (100)         | -        | -        | 0.231    | 2.38     |
| bridge (111)         | 0.271    | 2.64     | 0.058    | 3.23     |
| hollow (111)         | 0.286    | 2.68     | 0.051    | 3.41     |
| hollow (100)         | 0.293    | 2.81     | 0.049    | 3.58     |
| top/ad-atom Au (111) | 1.759    | 2.30     | 1.039    | 2.23     |
| motif (RX-Au-XR)/XR  | 0.782    | 2.55     | -        | -        |

**Table S1:** Optimized values of the parameter  $D_e$  and  $r_e$  in the selected configurations for both, alkylthiolates and alkylamines on Au surfaces.  $D_e$  in eV units and  $r_e$  in Å.

---

<sup>‡</sup> Both authors contributed equally to this work.

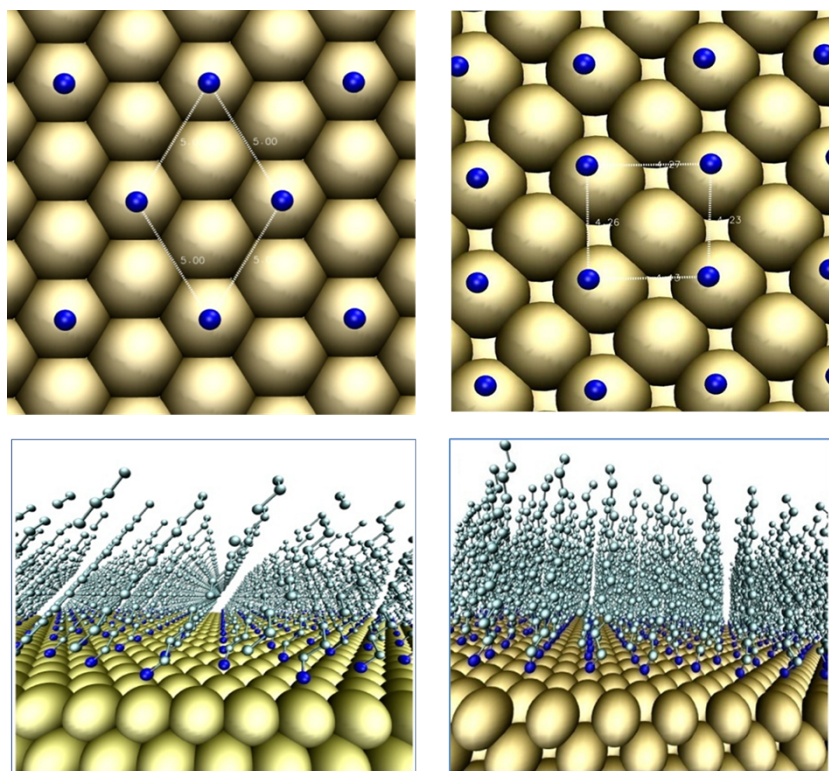

**Figure S1:** left) Molecular structure corresponding to a SAM of dodecanamine on Au(111) at coverage degree of  $\theta = 0.33$ , which is the  $(\sqrt{3} \times \sqrt{3})R30^\circ$  superlattice. Right) dodecanamine on Au(100) at coverage degree of  $\theta = 0.5$ , which corresponds to a  $(\sqrt{2} \times \sqrt{2})R45^\circ$  superlattice.

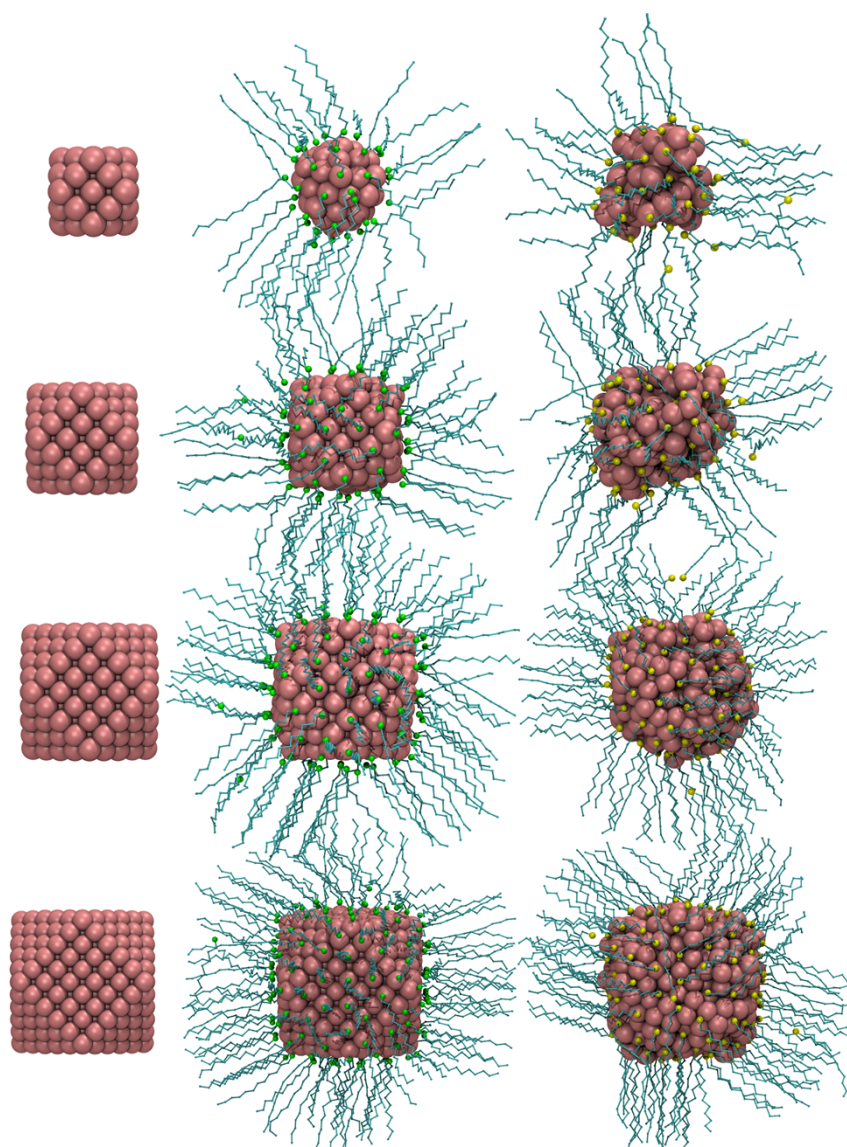

**Figure S2.** Atomic configuration taken from the LD simulations. Left) bare  $\text{Au}_N^{\text{fcc}}$  NPs containing  $N = 55, 147, 309,$  and  $561$  atoms, middle) amine-protected Au NPs, right) thiolate-protected Au NPs. (Pink spheres: Au, Green:  $\text{NH}_2$ , Yellow: S, Cyan: Alkyl chains)

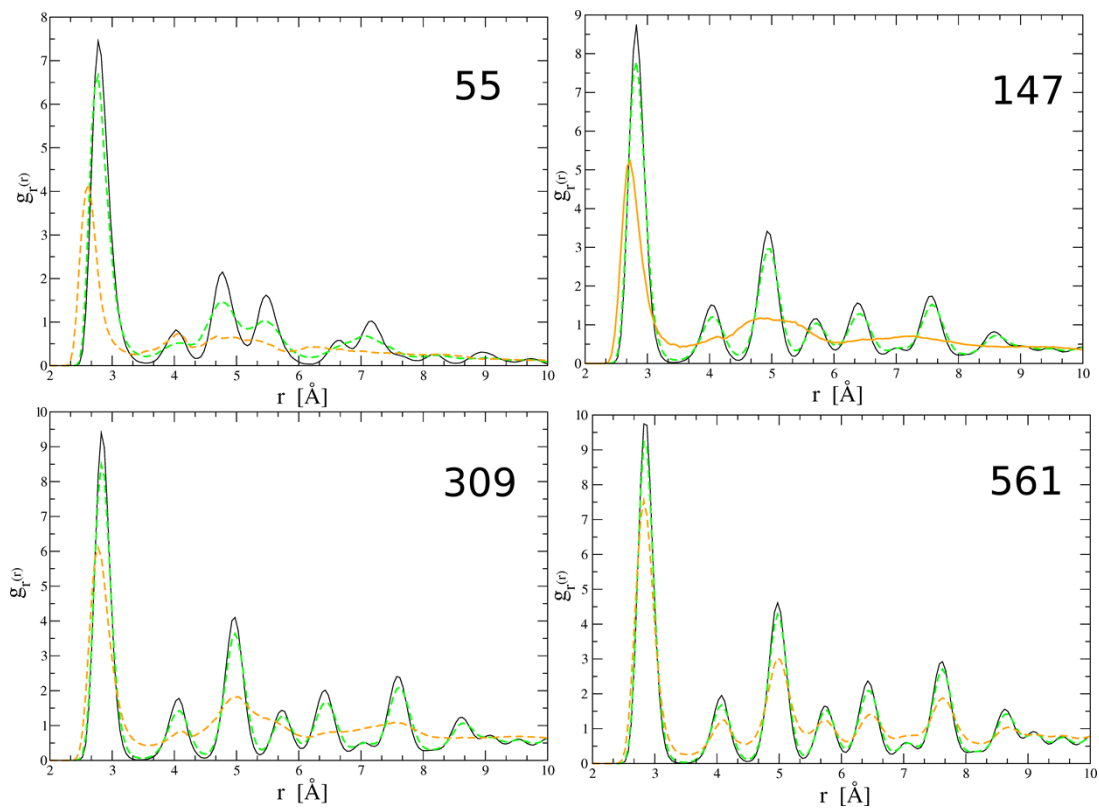

**Figure S3.** Pair distribution function obtained for Au-Au atom pairs. Black curves: bare Au NPs, green: amine-protected NPs, orange: thiolate-protected NPs. The numbers inside each graph correspond to the number of gold atoms in the  $\text{Au}_N^{\text{fcc}}$  NP.
